# Supplementary material for: Improvement of Cell Growth of Uterosacral Ligament Fibroblast Derived from Pelvic Organ Prolapse Patients by Cold Atmospheric Plasma Treated Liquid
Source: MDPI journal article supplement (doi:10.3390/cells10102728), 2021-10-13
Supplement: s1 [file s1]

**Supplementary Figure S1.** Cell viability treated with PTL according disease stage of pop and ovarian cancers compared with control which is stage 0 to stage 1.

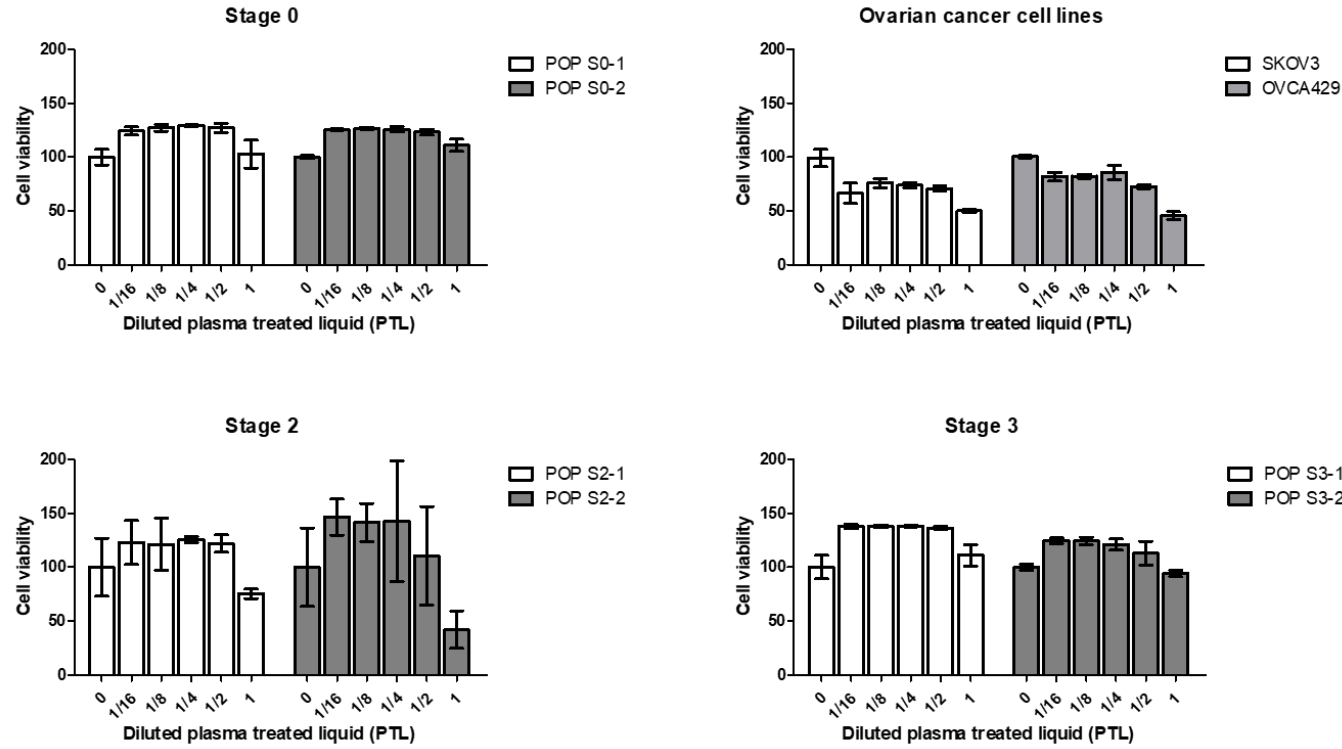

**Supplementary Table S1.** Components of cell culture media. Appearance red transparent solution with pH 7.0 to 7.6 at room temperature. 314-347 mOsm/kg H<sub>2</sub>O of osmolality and less than or equal to 1.0 EU/ml of endotoxin.

| components                                           | mg/L    |
|------------------------------------------------------|---------|
| CaCl <sub>2</sub> (anhydrous)                        | 200.00  |
| Fe(NO <sub>3</sub> ) <sub>3</sub> ·9H <sub>2</sub> O | 0.10    |
| KCl                                                  | 400.00  |
| MgSO <sub>4</sub> (anhydrous)                        | 97.67   |
| NaCl                                                 | 6400.00 |
| NaHCO <sub>3</sub>                                   | 3700.00 |
| NaH <sub>2</sub> PO <sub>4</sub> ·H <sub>2</sub> O   | 125.00  |
| D-Glucose                                            | 4500.00 |
| Phenol Red                                           | 15.00   |
| Sodium Pyruvate                                      | 110.00  |
| L-Arginine·HCl                                       | 84.00   |
| L-Cystine·2HCl                                       | 63.00   |
| L-Glutamine                                          | 584.00  |
| Glycine                                              | 30.00   |
| L-Histidine·HCl·H <sub>2</sub> O                     | 42.00   |
| L-Isoleucine                                         | 105.00  |
| L-Leucine                                            | 105.00  |
| L-Lysine·HCl                                         | 146.00  |
| L-Methionine                                         | 30.00   |
| L-Phenylalanine                                      | 66.00   |
| L-Serine                                             | 42.00   |
| L-Threonine                                          | 95.00   |
| L-Tryptophan                                         | 16.00   |
| L-Tyrosine·2Na·2H <sub>2</sub> O                     | 104.00  |
| L-Valine                                             | 94.00   |
| D-Ca Pantothenate                                    | 4.00    |
| Choline Chloride                                     | 4.00    |
| Folic Acid                                           | 4.00    |
| i-Inositol                                           | 7.20    |
| Niacinamide                                          | 4.00    |
| Riboflavin                                           | 0.40    |
| Thiamine·HCl                                         | 4.00    |
| Pyridoxine·HCl                                       | 4.00    |
